# Supplementary material for: Mn2+-doped Cs2ZnBr4 scintillator for X-ray imaging
Source: Royal Society of Chemistry journal article supplement (doi:10.1039/d2tc04249e), 2022-11-15
Supplement: d2tc04249e1.pdf [file d2tc04249e1.pdf]

## Electronic supplementary information

### **Mn<sup>2+</sup>-doped Cs<sub>2</sub>ZnBr<sub>4</sub> scintillator for X-ray imaging**

Binbin Su,<sup>a</sup> Kai Han,<sup>2</sup> Zhiguo Xia <sup>\*ab</sup>

a. The State Key Laboratory of Luminescent Materials and Devices, Guangdong Provincial Key Laboratory of Fiber Laser Materials and Applied Techniques, Guangdong Engineering Technology Research and Development Center of Special Optical Fiber Materials and Devices, School of Materials Science and Engineering, South China University of Technology, Guangzhou 510641, China.

b. School of Physics and Optoelectronics, South China University of Technology, Guangzhou 510641, China

**Table S1.** Main parameters of Rietveld refinement of Cs<sub>2</sub>ZnBr<sub>4</sub>:xMn<sup>2+</sup>.

| x(Mn)      | Space Group | Cell parameters (Å ), | R <sub>p</sub> , R <sub>wp</sub> , R <sub>exp</sub> , $\chi^2$ |
|------------|-------------|-----------------------|----------------------------------------------------------------|
| <b>0</b>   | <i>Pnma</i> | a = 10.19830 (7),     | 16.5, 11.7, 10.07, 1.34                                        |
|            |             | b = 7.73996 (8),      |                                                                |
|            |             | c = 13.53616 (7),     |                                                                |
|            |             | V = 1068.47 (3)       |                                                                |
| <b>25%</b> | <i>Pnma</i> | a = 10.20406 (0),     | 17.0, 13.6, 9.17, 2.19                                         |
|            |             | b = 7.74563 (6),      |                                                                |
|            |             | c = 13.54518 (5),     |                                                                |
|            |             | V = 1070.57 (5)       |                                                                |

**Table S2.** Fractional atomic coordinates and isotropic displacement parameters (Å<sup>2</sup>) of Cs<sub>2</sub>ZnBr<sub>4</sub>:xMn<sup>2+</sup>

| Atom | x          | y    | z          | occ     |
|------|------------|------|------------|---------|
| 0 %  |            |      |            |         |
| Cs1  | 0.6358 (9) | 0.25 | 0.3962 (6) | 0.5     |
| Cs2  | 0.4756 (9) | 0.25 | 0.8298 (4) | 0.5     |
| Zn   | 0.2283 (1) | 0.25 | 0.4166 (1) | 0.5     |
| Br1  | 0.0033 (8) | 0.25 | 0.3995 (4) | 0.5     |
| Br2  | 0.3117 (2) | 0.25 | 0.5902 (5) | 0.5     |
| Br3  | 0.3265 (4) | 0    | 0.3458 (4) | 1.0     |
| 25 % |            |      |            |         |
| Cs1  | 0.6362 (3) | 0.25 | 0.3940 (9) | 0.5     |
| Cs2  | 0.4769 (1) | 0.25 | 0.8317 (8) | 0.5     |
| Zn   | 0.2322 (7) | 0.25 | 0.4144 (0) | 0.37503 |
| Mn   | 0.2322 (7) | 0.25 | 0.4144 (0) | 0.12497 |
| Br1  | 0.0014 (3) | 0.25 | 0.3977 (3) | 0.5     |
| Br2  | 0.3196 (1) | 0.25 | 0.5918 (5) | 0.5     |
| Br3  | 0.3254 (1) | 0    | 0.3458 (1) | 1.0     |

**Table S3.** The result of ICP-OES measurements for Cs<sub>2</sub>ZnBr<sub>4</sub>:xMn<sup>2+</sup>

| <b>Mn/Zn<br/>feed ratio</b> | <b>molar</b> | <b>actual Zn<br/>concentration<br/>(mg/kg)</b> | <b>actual Mn<br/>concentration<br/>(mg/kg)</b> | <b>actual Mn-to-Zn<br/>molar ratio</b> |
|-----------------------------|--------------|------------------------------------------------|------------------------------------------------|----------------------------------------|
| 0.05:0.95 (5%)              |              | 99023.1                                        | 636.7                                          | 0.64%                                  |
| 0.10:0.90 (10%)             |              | 98433.4                                        | 1268.5                                         | 1.29%                                  |
| 0.15:0.85 (15%)             |              | 97639.9                                        | 1480.1                                         | 1.52%                                  |
| 0.20:0.80 (20%)             |              | 95294.9                                        | 4258.3                                         | 4.47%                                  |
| 0.25:0.75 (25%)             |              | 88197.3                                        | 9490.8                                         | 10.76%                                 |
| 0.30:0.70 (30%)             |              | 91028.9                                        | 8324.5                                         | 9.14%                                  |

**Table S4.** PLQYs of Mn<sup>2+</sup>-doped Cs<sub>2</sub>ZnBr<sub>4</sub> with different Mn<sup>2+</sup> concentrations.

| <b>x Mn<sup>2+</sup></b> | <b>PLQY</b> |
|--------------------------|-------------|
| 5%                       | 12.66%      |
| 10%                      | 19.57%      |
| 15%                      | 21.75%      |
| 20%                      | 26.73%      |
| 25%                      | 58.82%      |
| 30%                      | 45.05%      |

**Table S5.** PL lifetimes of the green emissions for Mn<sup>2+</sup>-doped Cs<sub>2</sub>ZnBr<sub>4</sub> polycrystalline powders with different Mn<sup>2+</sup> concentrations.

| $\lambda_{\text{ex}} = 365 \text{ nm}, \lambda_{\text{em}} = 526 \text{ nm}$ |                        |                        |                         |
|------------------------------------------------------------------------------|------------------------|------------------------|-------------------------|
| $x \text{ Mn}^{2+}$                                                          | $\tau_1 (\mu\text{s})$ | $\tau_2 (\mu\text{s})$ | $\tau_{\text{average}}$ |
| 5%                                                                           | 25.41                  | 151.58                 | 93.62                   |
| 10%                                                                          | 20.64                  | 165.18                 | 126.32                  |
| 15%                                                                          | 15.06                  | 165.25                 | 131.41                  |
| 20%                                                                          | 14.59                  | 187.71                 | 135.19                  |
| 25%                                                                          | 14.17                  | 287.80                 | 255.90                  |
| 30%                                                                          | 9.27                   | 262.86                 | 234.13                  |

**Table S6.** PL lifetimes of the red emissions for Mn<sup>2+</sup>-doped Cs<sub>2</sub>ZnBr<sub>4</sub> polycrystalline powders with different Mn<sup>2+</sup> concentrations.

| $x \text{ Mn}^{2+}$ | $\tau (\mu\text{s})$ |
|---------------------|----------------------|
| 5%                  | 158.30               |
| 10%                 | 156.92               |
| 15%                 | 156.15               |
| 20%                 | 157.55               |
| 25%                 | 163.63               |
| 30%                 | 157.98               |

**Table S7.** Radioluminescence properties of recently reported metal halide scintillators.

| Scintillators                                                                    | Ligh yields (photons/MeV) | Detection limit (nGy <sub>air</sub> /s) | Spatial resolution (lp/mm) | Imaging             | Res       |
|----------------------------------------------------------------------------------|---------------------------|-----------------------------------------|----------------------------|---------------------|-----------|
| Cs <sub>3</sub> Cu <sub>2</sub> I <sub>5</sub>                                   | 79279                     | /                                       | 0.32 mm                    | Films               | 1         |
| Cs <sub>3</sub> Cu <sub>2</sub> I <sub>5</sub>                                   | 30000                     | 158                                     |                            | Single crystal      | 2         |
| Rb <sub>2</sub> CuCl <sub>3</sub>                                                | 16600                     | 88.5                                    | /                          | /                   | 3         |
| Rb <sub>2</sub> CuBr <sub>3</sub>                                                | 91056                     | 121.5                                   | /                          | /                   | 4         |
| K <sub>2</sub> CuBr <sub>3</sub>                                                 | 23806                     | 132.8                                   | /                          | /                   | 5         |
| Cs <sub>2</sub> AgI <sub>3</sub> :Cu <sup>+</sup>                                | 82900                     | 77.8                                    | 16.2                       | PDMS composite film | 6         |
| Rb <sub>2</sub> AgBr <sub>3</sub>                                                | 25600                     | 19                                      | 10.2                       | Film                | 7         |
| (C <sub>38</sub> H <sub>34</sub> P <sub>2</sub> )MnBr <sub>4</sub>               | 66256                     | 461.1                                   | 0.322 mm                   | PDMS composite film | 8         |
| TPP <sub>2</sub> MnBr <sub>4</sub>                                               | 78000 ± 2000              | 8.8                                     | 15.7                       | Ceramic wafer       | 9         |
| (ETP) <sub>2</sub> MnBr <sub>4</sub>                                             | 35000 ± 2000              | 103                                     | 13.4 l                     | Transparent glass   | 10        |
| (C <sub>24</sub> H <sub>20</sub> P <sub>2</sub> ) <sub>2</sub> MnBr <sub>4</sub> | /                         | 608                                     | 14.5                       | TPU composite film  | 11        |
| C <sub>4</sub> H <sub>12</sub> NMnCl <sub>3</sub>                                | 50500                     | 36.9                                    | /                          | SO composite film   | 12        |
| (C <sub>8</sub> H <sub>20</sub> N) <sub>2</sub> MnBr <sub>4</sub>                | 24400                     | 24.2                                    | 5                          | SO composite film   | 12        |
| (Bmpip) <sub>2</sub> Cu <sub>2</sub> Br <sub>4</sub>                             | 16000                     | 710                                     | /                          | /                   | 13        |
| (DIET) <sub>3</sub> Cu <sub>3</sub> Br <sub>3</sub>                              | 20000 ± 700               | 189                                     | 11.71                      | PDMS composite film | 14        |
| (TBA)CuCl <sub>2</sub>                                                           | 23373                     | /                                       | /                          | PVDF composite film | 15        |
| (TBA)CuBr <sub>2</sub>                                                           | 24134                     | /                                       | /                          | PVDF composite film | 15        |
| Cs <sub>2</sub> ZnBr <sub>4</sub> :Mn <sup>2+</sup>                              | 15600                     | 1160                                    | 5.06                       | PDMS composite film | This work |

**Note:** “PMMA”, polymethyl methacrylate; “PDMS”, polydimethylsiloxane; “TPU”, thermoplastic polyurethane; “SO”, sucrose octaacetate; “PVDF”, polyvinylidene fluoride.

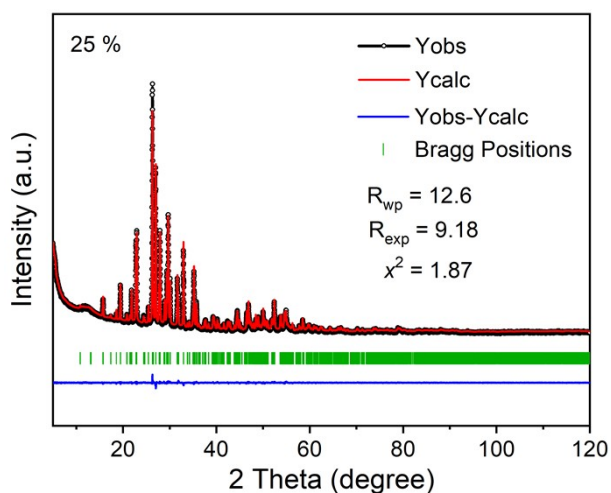**Figure S1.** Rietveld refinement of 25%Mn<sup>2+</sup>-doped Cs<sub>2</sub>ZnBr<sub>4</sub> sample.

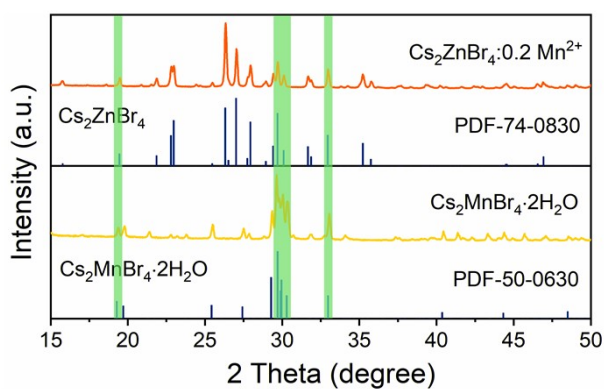

**Figure S2.** XRD patterns of  $\text{Cs}_2\text{ZnBr}_4:25\%\text{Mn}^{2+}$  and  $\text{Cs}_2\text{MnBr}_4\cdot 2\text{H}_2\text{O}$  samples.

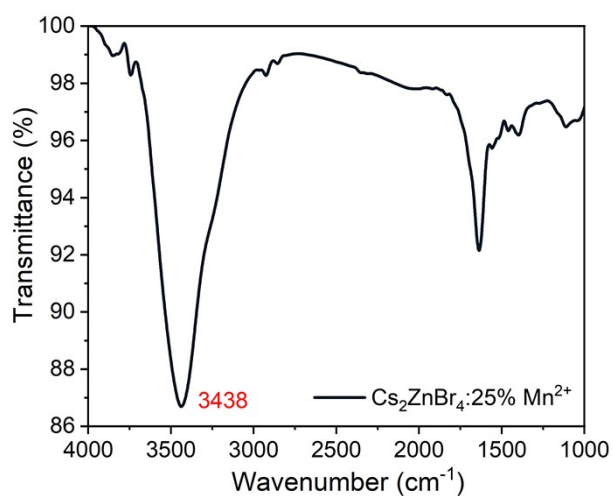

**Figure S3.** Fourier transform infrared spectrum (FTIR) of  $\text{Cs}_2\text{ZnBr}_4:25\%\text{Mn}^{2+}$  sample.

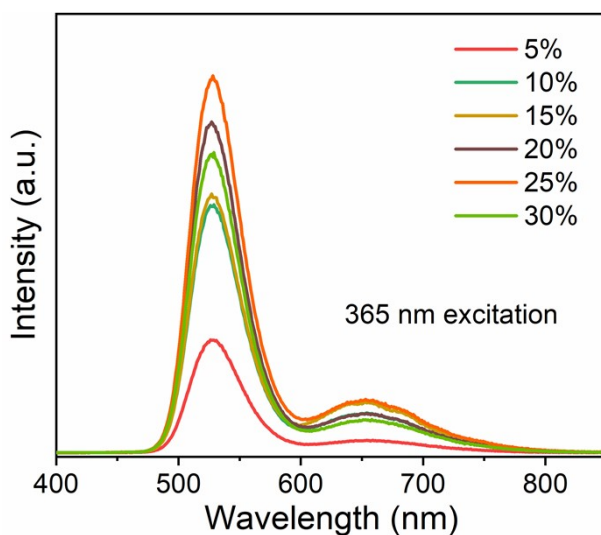

**Figure S4.** PL spectra of  $\text{Mn}^{2+}$ -doped  $\text{Cs}_2\text{ZnBr}_4$  samples with different  $\text{Mn}^{2+}$  concentrations at room temperature ( $\lambda_{\text{ex}} = 365 \text{ nm}$ ).

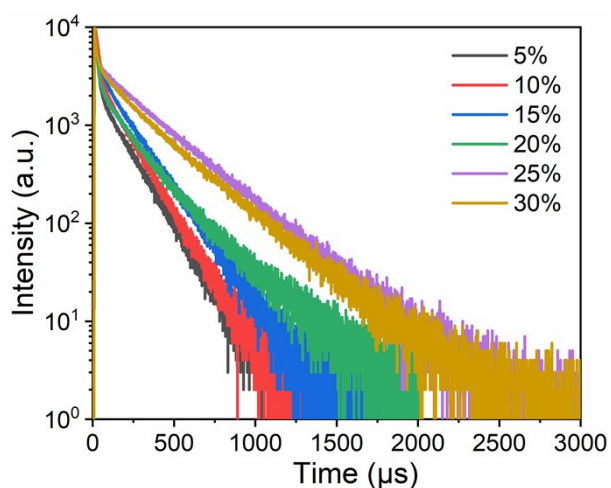

**Figure S5.** PL decay curves of  $\text{Mn}^{2+}$ -doped  $\text{Cs}_2\text{ZnBr}_4$  samples with different  $\text{Mn}^{2+}$  concentrations at room temperature ( $\lambda_{\text{ex}} = 365 \text{ nm}$ ,  $\lambda_{\text{em}} = 526 \text{ nm}$ ).

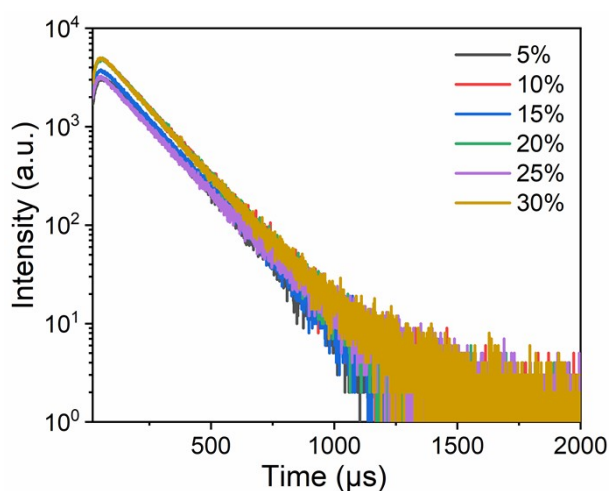

**Figure S6.** PL decay curves of  $\text{Mn}^{2+}$ -doped  $\text{Cs}_2\text{ZnBr}_4$  samples with different  $\text{Mn}^{2+}$  concentrations at room temperature ( $\lambda_{\text{ex}} = 365 \text{ nm}$ ,  $\lambda_{\text{em}} = 655 \text{ nm}$ ).

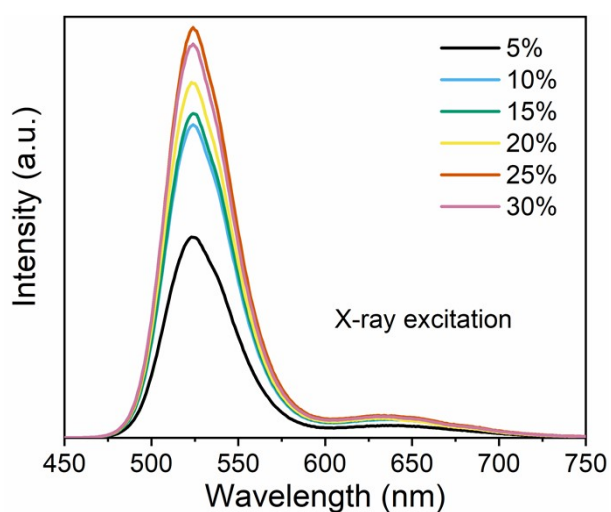

**Figure S7.** RL spectra of  $\text{Mn}^{2+}$ -doped  $\text{Cs}_2\text{ZnBr}_4$  samples with different  $\text{Mn}^{2+}$  concentrations under X-ray excitation at room temperature (tube voltage: 50 kV; dose rate:  $96.09 \mu\text{Gy}_{\text{air}} \text{ s}^{-1}$ ).

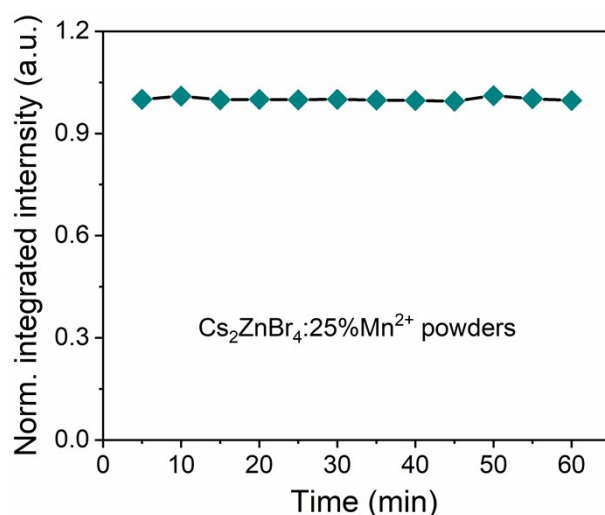

**Figure S8.** PL stabilities of  $\text{Cs}_2\text{ZnBr}_4:25\%\text{Mn}^{2+}$  under continuous UV illumination ( $\lambda_{\text{ex}} = 365 \text{ nm}$ ).

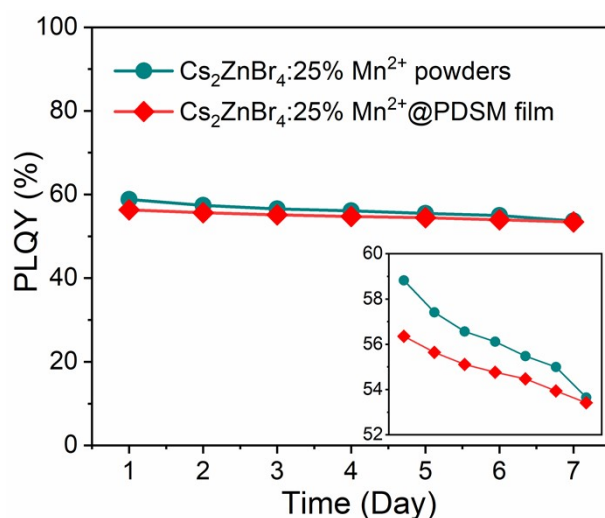

**Figure S9.** The stabilities of PLQYs of  $\text{Cs}_2\text{ZnBr}_4:25\%\text{Mn}^{2+}$  polycrystalline powders and  $\text{Cs}_2\text{ZnBr}_4:25\%\text{Mn}^{2+}$ @PDSM thin film, inset shows the enlarged pattern.

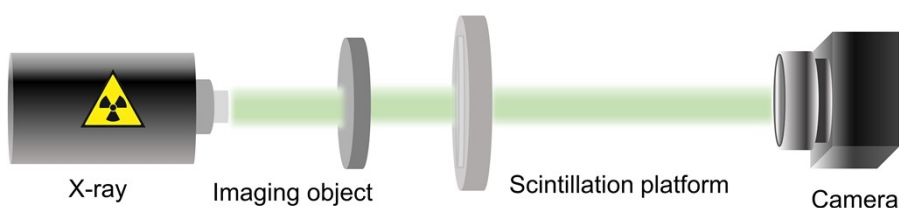

**Figure S10.** The home-made X-ray imaging system.

## Reference

- 1 L. Y. Lian, M. Y. Zheng, W. Z. Zhang, L. X. Yin, X. Y. Du, P. Zhang, X. W. Zhang, J. B. Gao, D. L. Zhang, L. Gao, G. D. Niu, H. S. Song, R. Chen, X. Z. Lan, J. Tang and J. B. Zhang, *Adv. Sci.*, 2020, **7**, 2000195.
- 2 Q. Wang, Q. Zhou, M. Nikl, J. W. Xiao, R. Kucerkova, A. Beitlerova, V. Babin, P. Prusa, V. Linhart, J. K. Wang, X. M. Wen, G. D. Niu, J. Tang, G. H. Ren and Y. T. Wu, *Adv. Opt. Mater.*, 2022, **10**, 2200304.
- 3 X. Zhao, G. D. Niu, J. S. Zhu, B. Yang, J. H. Yuan, S. R. Li, W. R. Gao, Q. S. Hu, L. X. Yin, K. H. Xue, E. Lifshitz, X. S. Miao and J. Tang, *J. Phys. Chem. Lett.*, 2020, **11**, 1873-1880.
- 4 B. Yang, L. Yin, G. Niu, J. H. Yuan, K. H. Xue, Z. Tan, X. S. Miao, M. Niu, X. Du, H. Song, E. Lifshitz and J. Tang, *Adv. Mater.*, 2019, **31**, e1904711.



- 5 W. R. Gao, G. D. Niu, L. X. Yin, B. Yang, J. H. Yuan, D. D. Zhang, K. H. Xue, X. S. Miao, Q. S. Hu, X. Y. Du and J. Tang, *ACS Appl. Electron. Mater.*, 2020, **2**, 2242-2249.
- 6 T. Y. He, Y. Zhou, X. J. Wang, J. Yin, A. Gutiérrez, L., J. X. Wang, Y. H. Zhang, O. M. Bakr and O. F. Mohammed, *ACS Energy Lett.*, 2022, **7**, 2753-2760.
- 7 M. Y. Zhang, X. M. WANG, B. Yang, J. S. Zhu, G. D. Niu, H. D. Wu, L. X. Yin, X. Y. Du, M. Niu, Y. S. Ge, Q. G. Xie, Y. F. Yan and J. Tang, *Adv. Funct. Mater.*, 2020, **31**, 2007921.
- 8 L. J. Xu, X. S. Lin, Q. Q. He, M. Worku and B. W. Ma, *Nat. Commun.*, 2020, **11**, 4329.
- 9 K. Han, K. Sakhatskyi, J. C. Jin, Q. Zhang, M. V. Kovalenko and Z. G. Xia, *Adv. Mater.*, 2022, **34**, e2110420.
- 10 B. H. Li, Y. Xu, X. L. Zhang, K. Han, J. C. Jin and Z. G. Xia, *Adv. Opt. Mater.*, 2022, **10**, 2102793.
- 11 K. Y. Xia, P. Ran, W. W. Wang, J. W. Yu, G. P. Xu, K. Wang, X. D. Pi, Q. Q. He, Y. Yang and J. Pan, *Adv. Opt. Mater.*, 2022, **10**, 2201028.
- 12 T. M. Jiang, W. B. Ma, H. Zhang, Y. Tian, G. Lin, W. G. Xiao, X. Yu, J. B. Qiu, X. H. Xu, Y. Yang and D. X. Ju, *Adv. Funct. Mater.*, 2021, **31**, 2009973.
- 13 T. T. Xu, Y. Y. Li, M. Nikl, R. Kucerkova, Z. Y. Zhou, J. Chen, Y. Y. Sun, G. D. Niu, J. Tang, Q. Wang, G. H. Ren and Y. T. Wu, *ACS Appl. Mater. Interfaces*, 2022, **14**, 14157-14164.
- 14 K. Han, J. C. Jin, B. B. Su, J. W. Qiao and Z. G. Xia, *Adv. Opt. Mater.*, 2022, **10**, 2200865.
- 15 L. Y. Lian, X. Wang, P. Zhang, J. S. Zhu, X. W. Zhang, J. B. Gao, S. Wang, G. J. Liang, D. L. Zhang, L. Gao, H. S. Song, R. Chen, X. Z. Lan, W. X. Liang, G. D. Niu, J. Tang and J. B. Zhang, *J. Phys. Chem. Lett.*, 2021, **12**, 6919-6926.
